# Supplementary material for: Construction of Circulating MicroRNAs-Based Non-invasive Prediction Models of Recurrent Implantation Failure by Network Analysis
Source: Front Genet. 2021 Jul 23;12:712150. doi: 10.3389/fgene.2021.712150 (PMC8344057; doi:10.3389/fgene.2021.712150)
Supplement: Supplementary Table 2 — The differentially expressed genes (DEGs) list of GSE71331/71332. [file Table_2.XLSX]

## Sheet: DE LncRNA 71331
	logFC	AveExpr	t	P.Value	adj.P.Val	B
AL162584.1	-3.01072	8.20594	-3.3138	0.00475081	0.514421	-2.14065
DLGAP1-AS3	-2.80164	9.22603	-3.01544	0.00873461	0.544234	-2.55447
AC100826.1	-2.77299	6.15994	-4.20621	0.000771161	0.514421	-0.943453
LINC02540	-2.67045	6.65951	-2.68564	0.016996	0.544234	-3.01098
LINC01502	-2.47166	11.5377	-2.49646	0.0247453	0.544234	-3.26936
AC034206.1	-2.04916	14.1987	-2.19836	0.0441185	0.553923	-3.66597
AC243960.3	-1.87095	6.6912	-2.80492	0.0133768	0.544234	-2.84645
AC020656.1	-1.77905	8.50646	-4.47388	0.000451232	0.514421	-0.604738
CD177P1	-1.6932	9.65116	-3.36862	0.00424657	0.514421	-2.06496
AC130456.3	-1.68298	11.6857	-2.43804	0.0277549	0.544234	-3.34827
AC130324.1	-1.64045	8.52101	-3.21479	0.00581707	0.519577	-2.27771
AC126407.1	-1.58254	10.1012	-2.63785	0.0186976	0.544234	-3.07661
AP000757.2	-1.55758	8.73545	-2.2981	0.0364368	0.548204	-3.53508
AC006453.3	-1.51441	10.2154	-3.68221	0.00223523	0.514421	-1.63615
AC022893.2	-1.48777	6.46867	-3.70688	0.00212535	0.514421	-1.60279
AC087521.3	-1.46622	10.0943	-4.16863	0.000831835	0.514421	-0.991897
AC087521.1	-1.46622	10.0943	-4.16863	0.000831835	0.514421	-0.991897
AC104777.1	-1.45239	6.66296	-2.93909	0.0101994	0.544234	-2.6605
LINC00927	-1.40031	8.95129	-6.02178	2.39e-05	0.253975	1.10893
SLC7A11-AS1	-1.37459	7.69902	-4.06863	0.00101808	0.514421	-1.1218
Z82188.2	-1.35208	9.8404	-4.73691	0.000268307	0.514421	-0.28334
AC068234.2	-1.33578	9.703	-2.6628	0.0177897	0.544234	-3.04237
AC073525.1	-1.29134	11.0854	-2.21112	0.0430571	0.553923	-3.64933
BX322234.1	-1.2846	12.8389	-2.49069	0.0250281	0.544234	-3.27718
ARSEP1	-1.28295	6.88561	-2.72491	0.0157108	0.544234	-2.95693
KIF18BP1	-1.26581	6.74513	-2.75314	0.0148454	0.544234	-2.91799
AC092325.1	-1.26581	6.74513	-2.75314	0.0148454	0.544234	-2.91799
LINC02672	-1.26281	6.71693	-2.41734	0.0289025	0.544234	-3.37611
AL031123.4	-1.25779	7.09894	-2.60272	0.0200519	0.544234	-3.12471
Z99774.1	-1.25776	14.0846	-4.09721	0.000960886	0.514421	-1.08453
LINC02454	-1.25622	5.99402	-3.51159	0.00316898	0.514421	-1.86848
AL445465.1	-1.24681	6.39436	-3.39985	0.00398357	0.514421	-2.02193
FAM172BP	-1.24322	6.13078	-2.59507	0.0203591	0.544234	-3.13516
AL513217.1	-1.22015	11.5052	-2.82768	0.0127771	0.544234	-2.81496
AC131944.1	-1.21631	12.9247	-2.60335	0.0200268	0.544234	-3.12384
AC091826.2	-1.21556	6.54837	-2.86044	0.0119593	0.544234	-2.76958
LINC01615	-1.21028	11.9354	-2.23694	0.0409835	0.553923	-3.61559
IGLV3-9	-1.20619	6.67768	-2.37435	0.031431	0.544234	-3.43371
AL355922.4	-1.18456	7.3989	-3.41041	0.00389839	0.514421	-2.00739
AL355922.3	-1.18456	7.3989	-3.41041	0.00389839	0.514421	-2.00739
AL355922.1	-1.18456	7.3989	-3.41041	0.00389839	0.514421	-2.00739
PGM5P3-AS1	-1.17362	11.0158	-2.21727	0.0425545	0.553923	-3.64131
AC091588.3	-1.16878	6.65565	-3.90058	0.00143188	0.514421	-1.34323
LINC01378	-1.16656	14.1971	-2.30079	0.0362483	0.548204	-3.53153
VIPR1-AS1	-1.16529	10.6097	-2.84659	0.0122986	0.544234	-2.78877
ARSE	-1.15949	8.30243	-2.69755	0.0165959	0.544234	-2.99461
C8orf37-AS1	-1.15885	11.4217	-3.12377	0.00700517	0.53955	-2.404
AL138733.1	-1.13997	8.70682	-3.20222	0.0059685	0.522626	-2.29515
IGLV3-27	-1.13002	9.77441	-2.41019	0.0293095	0.544234	-3.38571
AC063952.4	-1.12376	8.36531	-4.11408	0.000928673	0.514421	-1.06258
AC140479.6	-1.11801	10.6297	-2.73184	0.0154939	0.544234	-2.94737
AL162258.2	-1.10664	10.8369	-2.25887	0.0392953	0.552473	-3.58681
AC022730.3	-1.10119	8.26051	-4.06434	0.00102696	0.514421	-1.1274
AC022730.4	-1.10119	8.26051	-4.06434	0.00102696	0.514421	-1.1274
AC016394.1	-1.09721	9.32452	-2.7847	0.0139328	0.544234	-2.87441
SMIM25	-1.09222	7.06746	-3.5678	0.00282455	0.514421	-1.79164
MGAT3-AS1	-1.09094	5.93022	-3.78478	0.00181287	0.514421	-1.49789
AC097375.4	-1.07775	7.67093	-3.27514	0.00514183	0.519577	-2.19412
AC097375.3	-1.07775	7.67093	-3.27514	0.00514183	0.519577	-2.19412
LINC02309	-1.06976	7.21344	-2.20839	0.0432823	0.553923	-3.6529
AP001360.2	-1.06401	8.22056	-3.38462	0.00410972	0.514421	-2.0429
AC074286.1	-1.05269	8.91055	-2.89726	0.0111012	0.544234	-2.71854
AC079305.3	-1.05269	8.91055	-2.89726	0.0111012	0.544234	-2.71854
LINC02769	-1.05243	12.9584	-3.19575	0.00604789	0.522626	-2.30412
B3GALT5-AS1	-1.022	6.71223	-3.70186	0.00214727	0.514421	-1.60957
AC006372.1	-1.01932	10.6603	-2.34902	0.0330174	0.544234	-3.4675
PGM5P4-AS1	-1.01789	11.7433	-2.14559	0.048768	0.558573	-3.73433
AC092969.1	-1.0124	7.03369	-3.59019	0.00269805	0.514421	-1.76112
AC103808.5	-1.00929	9.78058	-2.27249	0.0382797	0.549587	-3.56888
LINC01611	-1.0046	9.05541	-3.22213	0.0057305	0.519577	-2.26754
ZBTB20-AS3	1.0085	8.24594	3.00127	0.00898988	0.544234	-2.57416
AC092422.1	1.01292	8.8313	2.30731	0.035795	0.548204	-3.5229
AC107068.2	1.0422	9.97127	2.56724	0.0215151	0.544234	-3.17315
FAM13A-AS1	1.04671	11.2362	2.993	0.00914214	0.544234	-2.58564
CTAGE7P	1.06816	9.04203	2.56638	0.0215517	0.544234	-3.17432
AC140481.3	1.0726	6.69438	2.85405	0.0121147	0.544234	-2.77844
AL390726.5	1.11121	7.79084	2.32068	0.0348811	0.544234	-3.50517
FAM220BP	1.11121	7.79084	2.32068	0.0348811	0.544234	-3.50517
AC096531.2	1.1153	8.83942	2.46669	0.0262382	0.544234	-3.30964
AC011632.1	1.11594	7.87925	2.65812	0.0179569	0.544234	-3.04881
RPS4XP21	1.12437	11.5221	2.15625	0.0477931	0.557251	-3.72056
AC025178.1	1.12573	11.1077	3.06814	0.0078463	0.544234	-2.48126
SUZ12P1	1.13093	15.5218	2.87767	0.0115501	0.544234	-2.7457
AC002451.1	1.14036	10.3122	2.15322	0.0480688	0.557251	-3.72449
AC016716.2	1.14064	6.62064	2.80701	0.0133208	0.544234	-2.84357
AP000812.1	1.15217	9.7378	2.53602	0.0228867	0.544234	-3.21566
AP001646.2	1.15258	10.2961	2.17846	0.045821	0.553923	-3.69182
LINC02734	1.15258	10.2961	2.17846	0.045821	0.553923	-3.69182
AC007686.2	1.15573	7.08879	2.60404	0.0199995	0.544234	-3.1229
LINC02289	1.15573	7.08879	2.60404	0.0199995	0.544234	-3.1229
KRT18P55	1.16646	12.4465	3.36587	0.00427054	0.514421	-2.06876
AP001347.1	1.18962	8.21529	2.60405	0.0199992	0.544234	-3.12289
AL592430.1	1.19391	6.94461	2.53072	0.0231278	0.544234	-3.22287
AC083843.3	1.19631	9.60929	2.66363	0.0177603	0.544234	-3.04123
GYG2P1	1.2153	8.87233	2.92269	0.0105441	0.544234	-2.68326
ARSDP1	1.2153	8.87233	2.92269	0.0105441	0.544234	-2.68326
AC005725.1	1.21626	6.39681	2.80962	0.0132509	0.544234	-2.83995
AC021683.2	1.22158	12.4564	2.44344	0.0274626	0.544234	-3.34099
GGTA1P	1.22828	9.95342	2.64919	0.0182796	0.544234	-3.06106
AL359644.1	1.22828	9.95342	2.64919	0.0182796	0.544234	-3.06106
SRGAP2-AS1	1.22866	9.88408	2.38884	0.0305564	0.544234	-3.41433
TOB1-AS1	1.24594	16.0067	3.1983	0.00601641	0.522626	-2.30057
AC021733.2	1.27772	10.9281	2.76577	0.0144735	0.544234	-2.90056
AC007193.2	1.29036	7.2387	3.86769	0.001531	0.514421	-1.38698
AC107375.1	1.29126	6.59316	2.82338	0.0128882	0.544234	-2.82091
AC007342.3	1.33966	9.02302	2.60215	0.0200747	0.544234	-3.12549
AC073050.1	1.34565	8.7567	2.51129	0.0240321	0.544234	-3.24925
ZNF733P	1.34692	13.5668	2.69103	0.0168139	0.544234	-3.00358
ZNF734P	1.34692	13.5668	2.69103	0.0168139	0.544234	-3.00358
AC078883.1	1.34997	12.5096	2.56699	0.0215259	0.544234	-3.1735
SEPTIN4-AS1	1.3593	7.94669	2.58857	0.0206237	0.544234	-3.14405
AC021683.6	1.36244	7.56887	2.42243	0.0286163	0.544234	-3.36927
CXADRP3	1.36883	10.6107	2.93955	0.0101898	0.544234	-2.65985
AC074124.1	1.38147	7.32443	2.27285	0.0382534	0.549587	-3.56841
TTC21B-AS1	1.39099	7.30537	2.78735	0.0138586	0.544234	-2.87074
AL139220.2	1.39517	11.6194	2.24743	0.0401679	0.553923	-3.60184
KRT8P47	1.39517	11.6194	2.24743	0.0401679	0.553923	-3.60184
LINC01287	1.39929	9.41547	2.38722	0.0306531	0.544234	-3.4165
AC004830.2	1.41468	8.53206	3.11056	0.00719646	0.541853	-2.42234
AC003991.1	1.41704	13.3016	2.97197	0.00954119	0.544234	-2.61485
AC129492.2	1.42031	6.86708	2.81833	0.0130203	0.544234	-2.8279
FAR2P2	1.45395	9.69499	2.457	0.0267418	0.544234	-3.32271
AC022034.1	1.50253	7.40757	3.14034	0.00677226	0.532859	-2.38099
AC093797.1	1.51784	8.34661	2.17249	0.0463433	0.556591	-3.69955
AL078590.2	1.54526	8.98249	2.14952	0.0484063	0.557251	-3.72926
AL450992.2	1.55769	10.657	2.68927	0.0168732	0.544234	-3.006
AC027020.2	1.57914	10.2348	2.56312	0.0216913	0.544234	-3.17876
AL050404.1	1.65432	8.42491	2.39106	0.0304245	0.544234	-3.41136
AC025580.1	1.68925	7.71357	2.19376	0.0445063	0.553923	-3.67195
AL589990.1	1.77802	11.1061	2.45258	0.0269752	0.544234	-3.32868
AC129492.1	1.88897	8.0408	2.60403	0.0199999	0.544234	-3.12292
AC051619.6	1.96813	11.9799	2.36603	0.031944	0.544234	-3.44482
AC015660.1	1.97977	8.61423	2.49458	0.0248373	0.544234	-3.27191
PART1	2.13889	9.43168	2.68427	0.0170426	0.544234	-3.01287
AC096719.1	2.50337	9.26872	3.21881	0.0057695	0.519577	-2.27214
AL358613.3	2.57918	9.9164	2.44093	0.0275982	0.544234	-3.34438
AC010975.1	3.18894	8.84694	3.07736	0.00770033	0.544234	-2.46846

## Sheet: DE mRNA 71331
	logFC	AveExpr	t	P.Value	adj.P.Val	B
TMEM252	-2.9966	10.5621	-2.59948	0.0208311	0.530484	-3.14192
AOC1	-2.79509	12.0269	-7.17935	4.39e-06	0.0732678	1.95404
NRAP	-2.64445	8.74866	-4.26143	0.000769263	0.491052	-0.927758
GPX6	-2.59751	9.80294	-2.83372	0.0131363	0.517656	-2.82321
B4GALNT2	-2.54369	7.90619	-3.55313	0.00312491	0.491052	-1.84488
PAEP	-2.5306	14.9165	-2.28418	0.0382706	0.55613	-3.56244
HABP2	-2.43884	10.8294	-2.78517	0.0144603	0.517656	-2.8895
COMP	-2.22698	11.0266	-2.40723	0.030247	0.550227	-3.39995
DPP4	-2.14609	10.0202	-2.23651	0.0418873	0.55613	-3.62466
CXCL14	-2.04916	14.1987	-2.14721	0.0495387	0.557324	-3.74001
LBP	-2.04675	7.81383	-3.25857	0.00563273	0.501891	-2.24265
SERPINE1	-1.94318	7.53078	-4.83873	0.000253577	0.491052	-0.237611
GAST	-1.9259	11.584	-2.953	0.0103666	0.517656	-2.66006
XXYLT1	-1.9149	11.0019	-2.2795	0.0386121	0.55613	-3.56856
RARRES1	-1.82152	9.39422	-4.09993	0.00105566	0.491052	-1.13073
MLPH	-1.80677	7.50643	-2.96856	0.0100506	0.517656	-2.63877
SLC1A1	-1.78623	11.1557	-2.34709	0.0339454	0.55613	-3.47967
SPATA6L	-1.78623	11.1557	-2.34709	0.0339454	0.55613	-3.47967
LYZ	-1.77905	8.50646	-4.41139	0.000574634	0.491052	-0.743018
GPX3	-1.74263	15.3311	-2.8163	0.0135971	0.517656	-2.847
SLC6A12	-1.68439	8.06146	-3.38728	0.00435379	0.491052	-2.06803
RSPO3	-1.68351	8.60381	-2.90596	0.0113827	0.517656	-2.72443
TMC5	-1.68298	11.6857	-2.38543	0.0315413	0.550227	-3.42892
DHRS3	-1.66907	12.1845	-3.27828	0.00541485	0.49435	-2.21584
FABP3	-1.64369	9.39063	-3.78597	0.00196447	0.491052	-1.53619
SIGLEC12	-1.62734	6.72918	-4.62475	0.000380965	0.491052	-0.486683
SHISAL1	-1.62247	8.6594	-3.66726	0.00248826	0.491052	-1.69281
NNMT	-1.5874	11.3293	-2.93389	0.0107681	0.517656	-2.68621
MKRN3	-1.58254	10.1012	-2.58412	0.0214655	0.530484	-3.16268
OR10H5	-1.5816	6.36744	-3.01475	0.00916728	0.517656	-2.57556
KCNH6	-1.51701	6.99076	-5.88536	3.77e-05	0.314697	0.860771
IGSF3	-1.51441	10.2154	-3.62802	0.00269084	0.491052	-1.74493
CLU	-1.50739	11.4214	-3.44901	0.00384797	0.491052	-1.98469
EFEMP1	-1.49176	10.1349	-2.4405	0.0283688	0.550227	-3.35562
IGFBP6	-1.48267	8.61665	-2.6085	0.0204672	0.530484	-3.12972
C11orf96	-1.46622	10.0943	-4.12385	0.00100718	0.491052	-1.10042
IL19	-1.43837	6.8002	-3.00706	0.00930873	0.517656	-2.58608
TNFRSF8	-1.42011	6.82856	-4.40853	0.000577828	0.491052	-0.746508
ABLIM2	-1.3818	7.21088	-3.24322	0.00580835	0.505445	-2.26354
SLC7A11	-1.37459	7.69902	-4.03001	0.00121151	0.491052	-1.21983
WNT7A	-1.3698	8.72564	-2.8203	0.0134899	0.517656	-2.84154
MUC16	-1.36413	14.0536	-2.36382	0.0328758	0.55613	-3.45755
C1QTNF6	-1.35208	9.8404	-4.72301	0.000315806	0.491052	-0.371298
ITGB3	-1.33578	9.703	-2.61428	0.020237	0.530484	-3.12189
AC068234.1	-1.33578	9.703	-2.61428	0.020237	0.530484	-3.12189
LAMB3	-1.33296	11.12	-2.20479	0.044469	0.55613	-3.66583
MMP7	-1.3289	9.5376	-2.20315	0.0446065	0.55613	-3.66795
FAM20A	-1.31273	10.0382	-4.24684	0.000791498	0.491052	-0.945926
GFOD1	-1.30911	9.88442	-3.09633	0.00779049	0.517656	-2.46398
SYNE2	-1.30275	12.1734	-2.6767	0.017906	0.526491	-3.03723
NPR1	-1.29975	10.488	-3.85016	0.00172929	0.491052	-1.45221
TUBB3	-1.29365	9.31897	-3.60678	0.00280739	0.491052	-1.77322
GOLT1A	-1.29326	6.71595	-3.27892	0.00540799	0.49435	-2.21497
KCNC2	-1.29134	11.0854	-2.16669	0.0477659	0.557324	-3.71499
NLRP2	-1.29073	7.5521	-2.76501	0.0150477	0.523753	-2.917
FMOD	-1.28762	9.59561	-4.23758	0.000805957	0.491052	-0.957479
TNFAIP2	-1.28474	10.6888	-3.61304	0.00277254	0.491052	-1.76489
THBS2	-1.2846	12.8389	-2.44434	0.0281592	0.550227	-3.35049
GAS1	-1.2821	11.1926	-2.3165	0.0359873	0.55613	-3.52
ADAMTS9	-1.27811	10.5625	-3.09988	0.00773539	0.517656	-2.45912
AGR2	-1.27239	11.6272	-3.03363	0.00882856	0.517656	-2.54972
LGI2	-1.27093	7.0667	-3.1492	0.00700962	0.517656	-2.39174
GNG4	-1.24799	9.66308	-2.30688	0.0366528	0.55613	-3.53264
CXCR4	-1.23649	11.269	-2.92764	0.0109028	0.517656	-2.69477
SPP1	-1.21631	12.9247	-2.55876	0.0225542	0.530484	-3.19692
FA2H	-1.21596	7.16743	-3.43063	0.00399211	0.491052	-2.00948
ANG	-1.21279	10.6233	-2.81232	0.0137046	0.517656	-2.85244
C2	-1.20457	10.2969	-3.52002	0.00333863	0.491052	-1.88922
AL645922.1	-1.20457	10.2969	-3.52002	0.00333863	0.491052	-1.88922
CFB	-1.20457	10.2969	-3.52002	0.00333863	0.491052	-1.88922
IMPA2	-1.20365	10.3487	-2.60447	0.0206287	0.530484	-3.13516
ISM1	-1.19878	9.03745	-3.57576	0.00298677	0.491052	-1.81461
FGA	-1.19266	7.01729	-2.47707	0.0264324	0.538562	-3.30672
GATA6	-1.16878	6.65565	-3.8808	0.00162733	0.491052	-1.41231
VIPR1	-1.16529	10.6097	-2.80499	0.0139048	0.517656	-2.86245
CSF2RA	-1.16364	9.60955	-2.572	0.0219795	0.530484	-3.17905
BDKRB2	-1.16186	10.2346	-2.9555	0.0103152	0.517656	-2.65665
AL355102.2	-1.16186	10.2346	-2.9555	0.0103152	0.517656	-2.65665
DUSP5	-1.16184	7.43569	-3.53471	0.00324203	0.491052	-1.86953
SLC6A20	-1.16093	6.39443	-4.30825	0.000702137	0.491052	-0.869688
MALL	-1.16048	10.8971	-2.56575	0.0222487	0.530484	-3.18748
FBXL22	-1.15745	7.53555	-2.78671	0.0144164	0.517656	-2.8874
ASS1	-1.15737	12.9857	-3.43408	0.00396461	0.491052	-2.00482
LAMA4	-1.1429	11.6264	-4.01632	0.00124468	0.491052	-1.23737
MTHFD1L	-1.13997	8.70682	-3.16668	0.00676899	0.517656	-2.36788
LBH	-1.13709	10.3086	-4.08746	0.00108187	0.491052	-1.14656
PGBD5	-1.13656	8.51384	-2.52232	0.0242114	0.530484	-3.24599
SIGLEC15	-1.13489	6.9442	-2.47433	0.0265732	0.538562	-3.31039
MAOB	-1.13259	10.9526	-4.15899	0.000940036	0.491052	-1.05603
CD38	-1.13064	8.49843	-2.39401	0.0310256	0.550227	-3.41752
LILRA2	-1.12755	8.10739	-4.44603	0.000537363	0.491052	-0.700874
FCER1G	-1.12435	10.6791	-2.76886	0.0149338	0.522877	-2.91176
COLEC11	-1.11366	8.45398	-2.3055	0.0367494	0.55613	-3.53446
ADAM19	-1.11219	9.58804	-4.1007	0.00105405	0.491052	-1.12975
P3H2	-1.10386	9.16952	-4.3575	0.000637979	0.491052	-0.808982
SERPINB11	-1.09562	7.28093	-2.30974	0.0364538	0.55613	-3.52888
SYN3	-1.09497	13.1246	-3.67706	0.00244013	0.491052	-1.67982
TIMP3	-1.09497	13.1246	-3.67706	0.00244013	0.491052	-1.67982
BCL2A1	-1.08992	6.85203	-2.16307	0.048091	0.557324	-3.71965
IGFBP4	-1.08695	13.5102	-3.61514	0.00276092	0.491052	-1.76208
GRIA2	-1.08164	9.87743	-3.61754	0.00274771	0.491052	-1.75888
PLAT	-1.06917	11.4341	-3.17396	0.00667119	0.517656	-2.35794
KIAA0513	-1.05424	9.38705	-3.25724	0.00564766	0.501891	-2.24445
SNX29	-1.05231	10.821	-3.34287	0.0047584	0.491052	-2.12816
DYSF	-1.05184	9.78595	-2.91887	0.0110944	0.517656	-2.70676
CRYM	-1.04585	8.44063	-2.34561	0.0340417	0.55613	-3.48162
PPP1R37	-1.04058	7.6843	-4.62588	0.000380145	0.491052	-0.48535
CCDC184	-1.03088	7.39327	-2.78484	0.0144697	0.517656	-2.88995
CCDC149	-1.02816	11.2616	-3.49565	0.00350533	0.491052	-1.92194
ACADSB	-1.02747	9.28539	-3.38319	0.00438955	0.491052	-2.07356
APOBR	-1.0234	6.8108	-2.34068	0.0343639	0.55613	-3.48813
CAV2	-1.01833	9.93112	-4.10786	0.00103933	0.491052	-1.12067
ITGA2	-1.01645	8.47831	-2.9898	0.00963432	0.517656	-2.6097
FKRP	-1.0145	10.1159	-3.09238	0.00785205	0.517656	-2.46937
SLC1A5	-1.0145	10.1159	-3.09238	0.00785205	0.517656	-2.46937
SERPIND1	-1.01428	6.91045	-3.57583	0.00298637	0.491052	-1.81452
SULF1	-1.0132	10.5335	-4.55825	0.000432811	0.491052	-0.565747
FNDC4	-1.0124	10.6232	-3.06071	0.00836435	0.517656	-2.51268
KRTAP3-3	-1.01156	13.9483	-5.47519	7.82e-05	0.435262	0.454152
TSPAN1	-1.01154	11.9551	-2.55115	0.0228911	0.530484	-3.20718
ITGA3	-1.0086	11.0342	-2.5379	0.0234892	0.530484	-3.22503
KCNK3	-1.00113	10.5993	-3.37946	0.00442244	0.491052	-2.0786
FAM124B	1.00233	7.13847	2.84649	0.0128081	0.517656	-2.80576
CITED4	1.0025	13.2394	2.51103	0.0247485	0.530484	-3.26117
ARHGAP35	1.00461	13.2234	2.3629	0.032934	0.55613	-3.45877
SLC39A8	1.00513	11.1264	2.54692	0.0230802	0.530484	-3.21287
ZNF430	1.00614	7.57503	2.28298	0.0383575	0.55613	-3.564
OSER1	1.00781	9.72063	2.4181	0.0296207	0.550227	-3.38549
ZNF248	1.01241	13.7345	2.31999	0.0357485	0.55613	-3.5154
PCDH7	1.01324	10.6408	2.79587	0.0141579	0.517656	-2.87491
MCOLN3	1.0157	8.49509	2.30033	0.0371128	0.55613	-3.54125
WDR63	1.0157	8.49509	2.30033	0.0371128	0.55613	-3.54125
ITGB8	1.02064	9.50405	2.92376	0.0109872	0.517656	-2.70007
SCNN1A	1.02099	13.2876	2.77899	0.014638	0.520599	-2.89793
RPS6KA5	1.02334	11.3729	3.59885	0.00285218	0.491052	-1.78379
AARS2	1.02419	8.31922	2.65322	0.0187507	0.52872	-3.06911
CD24	1.02848	13.5432	2.56847	0.0221312	0.530484	-3.18381
SGK1	1.02876	13.0731	2.34756	0.0339148	0.55613	-3.47904
NLK	1.02916	8.65828	2.27738	0.0387676	0.55613	-3.57133
METAP1	1.03047	10.8824	2.28322	0.0383399	0.55613	-3.56368
BTAF1	1.03633	11.213	3.06243	0.00833569	0.517656	-2.51032
TMEM80	1.03863	8.88338	2.26325	0.0398205	0.55613	-3.5898
GMNC	1.0395	7.34058	2.57115	0.0220158	0.530484	-3.1802
CDC40	1.03955	10.307	2.14647	0.0496078	0.557324	-3.74096
ITGA4	1.04016	10.0903	2.50143	0.0252138	0.532292	-3.27406
CERKL	1.04016	10.0903	2.50143	0.0252138	0.532292	-3.27406
PLIN2	1.04085	12.1412	3.0725	0.00816999	0.517656	-2.49656
IFNGR1	1.04176	10.9938	2.39455	0.0309932	0.550227	-3.4168
NFXL1	1.0422	9.97127	2.53019	0.023844	0.530484	-3.2354
QPRT	1.04595	10.7355	2.67352	0.0180181	0.526491	-3.04155
FAM13A	1.04671	11.2362	2.96136	0.0101955	0.517656	-2.64862
SCD5	1.04829	10.6632	2.59696	0.020934	0.530484	-3.14533
WFDC8	1.04889	7.08558	2.32025	0.0357313	0.55613	-3.51507
FKBP3	1.05393	16.2971	2.55996	0.0225012	0.530484	-3.19529
MSX1	1.0561	10.0432	2.16118	0.0482618	0.557324	-3.72208
ADAM32	1.05837	8.16677	2.2071	0.0442764	0.55613	-3.66284
ADAM22	1.05842	7.49638	2.5264	0.0240201	0.530484	-3.2405
MCCC2	1.06447	12.6573	2.38096	0.0318131	0.551206	-3.43485
C10orf143	1.06816	9.04203	2.52796	0.0239474	0.530484	-3.2384
HGD	1.06859	12.2705	2.17312	0.0471944	0.557324	-3.70672
CLASP2	1.07298	10.1267	2.221	0.0431315	0.55613	-3.64482
GCNT2	1.07441	9.59222	3.65834	0.00253293	0.491052	-1.70465
RNF32	1.07465	11.9292	2.32169	0.0356331	0.55613	-3.51317
CTAGE1	1.07565	7.5648	2.87925	0.0120025	0.517656	-2.76096
ZNF436	1.07647	10.6614	3.28431	0.00534995	0.49435	-2.20764
RANBP17	1.07652	9.06501	2.49689	0.0254368	0.533302	-3.28015
ENY2	1.07842	11.649	2.40768	0.030221	0.550227	-3.39936
SEMA3G	1.08036	10.5018	3.05665	0.00843242	0.517656	-2.51823
GPSM2	1.08483	10.9461	2.75047	0.0154857	0.526491	-2.93683
IMPA1	1.08835	8.51798	2.17707	0.0468462	0.557324	-3.70163
TM9SF3	1.09183	11.3202	2.84503	0.0128452	0.517656	-2.80775
LGR4	1.09202	10.3221	2.75746	0.0152736	0.526491	-2.9273
MYOCOS	1.09494	6.5536	2.68549	0.0175993	0.526491	-3.02528
RXFP1	1.10669	12.2584	2.43995	0.0283987	0.550227	-3.35635
COLCA2	1.10889	6.72286	2.2409	0.0415412	0.55613	-3.61895
BARD1	1.10969	8.95	2.51373	0.0246188	0.530484	-3.25753
HS6ST1	1.11131	11.0431	2.38984	0.0312751	0.550227	-3.42306
PI15	1.11594	7.87925	2.61785	0.0200962	0.530484	-3.11706
ABCG1	1.1186	9.99394	2.7396	0.0158212	0.526491	-2.95164
LNX2	1.13206	8.7734	2.64545	0.0190383	0.530484	-3.07965
FZD3	1.1376	9.0111	2.84272	0.0129041	0.517656	-2.81091
F2RL2	1.14739	7.8967	4.32461	0.000680118	0.491052	-0.849475
ZNF275	1.15074	11.6715	3.33387	0.00484486	0.491052	-2.14036
FOLR1	1.15217	9.7378	2.49379	0.0255901	0.533302	-3.28431
ADO	1.15808	8.4856	2.35361	0.033525	0.55613	-3.47106
ZDHHC6	1.1625	12.7497	2.67839	0.0178466	0.526491	-3.03493
USP53	1.1699	10.8136	2.65634	0.0186362	0.52872	-3.06488
NPAS3	1.1824	7.42196	3.31757	0.00500548	0.491052	-2.16247
CAPS	1.1845	12.1535	3.37869	0.00442931	0.491052	-2.07965
ANAPC4	1.1884	11.0156	2.78891	0.0143539	0.517656	-2.8844
MIA2	1.18871	11.4646	3.20455	0.00627539	0.517656	-2.31622
CDC42SE2	1.1913	11.5517	2.44686	0.0280224	0.550141	-3.34713
ANKFN1	1.19792	8.7855	2.14819	0.0494486	0.557324	-3.73876
SNX30	1.20796	11.5849	2.64931	0.0188949	0.530484	-3.07442
SDK2	1.20876	8.47522	2.14316	0.0499148	0.557324	-3.7452
ALKAL2	1.21482	8.94636	2.93429	0.0107595	0.517656	-2.68566
SLIT1	1.21502	10.5129	2.25542	0.0404158	0.55613	-3.60003
PCDH19	1.21606	8.41947	3.44862	0.00385101	0.491052	-1.98522
RAB4A	1.22869	9.89259	2.21251	0.0438273	0.55613	-3.65583
SGCD	1.23032	7.89586	2.15067	0.0492196	0.557324	-3.73557
SPATA5L1	1.23206	7.90222	2.27608	0.0388633	0.55613	-3.57303
CKB	1.23476	11.3918	2.34764	0.03391	0.55613	-3.47894
SH3YL1	1.23768	10.599	2.37049	0.0324581	0.553472	-3.44872
CCDC146	1.24065	10.7815	3.07272	0.00816634	0.517656	-2.49625
ELP3	1.24383	12.8182	2.218	0.0433764	0.55613	-3.64871
EDN3	1.24392	10.4025	2.25248	0.0406416	0.55613	-3.60387
DLX6	1.24621	8.77974	2.30257	0.036955	0.55613	-3.53831
CHST4	1.26455	8.55185	2.47561	0.0265073	0.538562	-3.30867
SEMA3C	1.2708	6.46116	2.2558	0.0403863	0.55613	-3.59953
ANKRD37	1.27592	8.26553	2.33487	0.0347477	0.55613	-3.4958
CCN3	1.27772	10.9281	2.71891	0.0164794	0.526491	-2.97982
TXNDC16	1.2785	7.55763	2.15011	0.0492712	0.557324	-3.73629
ASPH	1.28007	13.0838	2.58625	0.0213766	0.530484	-3.15981
CFAP44	1.286	9.73464	3.48447	0.00358453	0.491052	-1.93696
HEY1	1.28635	9.4107	2.43303	0.0287802	0.550227	-3.36558
PPARG	1.29662	9.62577	2.9718	0.00998599	0.517656	-2.63434
SQLE	1.30218	10.089	2.46326	0.0271486	0.543199	-3.32521
FREM2	1.314	8.09835	3.92861	0.00148025	0.491052	-1.35029
DYNC1I1	1.31611	9.82442	2.40964	0.0301067	0.550227	-3.39674
AMOT	1.31687	6.60553	2.73112	0.0160881	0.526491	-2.9632
KLHL31	1.31865	7.15098	2.43092	0.0288978	0.550227	-3.3684
PIWIL2	1.32721	8.88443	2.69977	0.0171122	0.526491	-3.00587
PRKX	1.32878	10.3238	2.68192	0.0177232	0.526491	-3.03013
CD36	1.33283	12.4315	3.89157	0.00159294	0.491052	-1.39831
CPT1A	1.33613	11.7871	2.46817	0.0268916	0.540198	-3.31863
KIT	1.33969	9.51612	3.27171	0.00548654	0.498172	-2.22477
ANO3	1.34072	10.7612	2.89472	0.0116396	0.517656	-2.73981
MUC15	1.34072	10.7612	2.89472	0.0116396	0.517656	-2.73981
ZNF479	1.34692	13.5668	2.64208	0.0191648	0.530484	-3.08423
ITGA6	1.34997	12.5096	2.51856	0.0243892	0.530484	-3.25105
CSRP2	1.35665	9.83961	2.67271	0.0180469	0.526491	-3.04265
SEPTIN4	1.3593	7.94669	2.53978	0.0234033	0.530484	-3.22249
HEY2	1.35934	8.57338	2.93094	0.0108314	0.517656	-2.69025
OXCT1	1.3651	10.6717	2.17146	0.0473415	0.557324	-3.70886
BCKDHB	1.3678	10.2133	2.37434	0.0322194	0.553472	-3.44362
RBM28	1.38746	12.6618	2.24553	0.0411794	0.55613	-3.61293
SMAD9	1.39586	10.7779	2.87256	0.0121629	0.517656	-2.77012
OCLN	1.41528	13.5687	3.6625	0.00251203	0.491052	-1.69913
STEAP4	1.41704	13.3016	2.92008	0.0110677	0.517656	-2.70511
UFM1	1.41758	9.47293	2.40653	0.0302875	0.550227	-3.40088
AFF2	1.42044	7.72831	2.17098	0.047384	0.557324	-3.70947
GMPR	1.42562	11.5908	2.33864	0.0344982	0.55613	-3.49082
LRRC17	1.43123	8.2784	3.10052	0.00772553	0.517656	-2.45825
NRXN1	1.4438	10.2427	2.16877	0.0475809	0.557324	-3.71232
SLC9A2	1.44514	6.96963	2.25418	0.0405109	0.55613	-3.60165
CARMIL1	1.4558	10.2397	2.34624	0.0340009	0.55613	-3.48079
CWH43	1.45665	10.7234	2.27232	0.0391417	0.55613	-3.57795
SOX17	1.45963	11.4458	3.40773	0.00417926	0.491052	-2.04039
DCAF15	1.46709	10.547	2.75311	0.0154052	0.526491	-2.93323
DGKB	1.4755	8.5343	2.63392	0.0194736	0.530484	-3.09529
FKBP5	1.47552	10.9469	2.55209	0.022849	0.530484	-3.2059
SERPINB9	1.47786	9.6223	2.23602	0.0419262	0.55613	-3.6253
ALDH6A1	1.48046	11.9275	3.36394	0.00456195	0.491052	-2.09961
BBOF1	1.48046	11.9275	3.36394	0.00456195	0.491052	-2.09961
PLCB1	1.49382	10.8169	3.08245	0.00800922	0.517656	-2.48294
MUC7	1.49604	7.46277	2.51092	0.0247537	0.530484	-3.26131
IL33	1.49708	9.8471	3.08518	0.0079658	0.517656	-2.47922
NDUFAF1	1.5037	10.4159	2.52706	0.0239895	0.530484	-3.23961
MPZL2	1.50527	11.6592	2.18163	0.0464475	0.557324	-3.69576
TESMIN	1.51214	7.00868	2.77504	0.0147526	0.521082	-2.90332
CEP70	1.51888	9.23112	2.80348	0.0139464	0.517656	-2.86452
OPRK1	1.5339	10.6522	2.48526	0.0260167	0.535057	-3.29575
ATP6V1G1	1.53504	12.2903	2.80844	0.0138102	0.517656	-2.85774
CREB3L1	1.55677	10.6928	2.69428	0.0172978	0.526491	-3.01333
THEM4	1.55769	10.657	2.63546	0.0194147	0.530484	-3.09319
ANK3	1.55816	13.086	3.30243	0.00515951	0.49435	-2.18303
EHF	1.56238	11.4605	3.24319	0.00580867	0.505445	-2.26358
EPHA7	1.61525	8.37187	3.36474	0.00455468	0.491052	-2.09853
HOMER2	1.63743	12.3646	2.40453	0.0304044	0.550227	-3.40354
SLC7A1	1.65145	11.2387	2.75813	0.0152536	0.526491	-2.92639
KCNG1	1.65432	8.42491	2.33942	0.0344473	0.55613	-3.4898
FAM169A	1.67278	8.13331	2.51222	0.0246911	0.530484	-3.25956
C15orf48	1.68925	7.71357	2.14481	0.0497614	0.557324	-3.74309
GNG11	1.69301	10.8606	3.04115	0.00869715	0.517656	-2.53943
ADAMTS8	1.6982	10.5163	2.62422	0.0198469	0.530484	-3.10842
TFCP2L1	1.69938	9.74019	2.48682	0.0259381	0.535057	-3.29365
CCDC102B	1.71314	8.63664	3.69988	0.00233165	0.491052	-1.64961
ATP6V0E2	1.72258	11.0071	2.64736	0.0189672	0.530484	-3.07706
HLA-DOB	1.72548	8.75218	2.67099	0.0181079	0.526491	-3.04499
APOL4	1.7289	12.3203	2.42193	0.0294026	0.550227	-3.38038
PPM1H	1.7396	11.3875	2.99013	0.00962798	0.517656	-2.60924
CDC14A	1.77802	11.1061	2.39879	0.0307418	0.550227	-3.41117
ZNF621	1.81237	12.1771	2.31913	0.0358075	0.55613	-3.51654
SLC26A7	1.81873	8.11465	3.59732	0.00286088	0.491052	-1.78583
SAMD13	1.86215	7.89802	3.12843	0.0073066	0.517656	-2.4201
SLAIN1	1.88386	10.255	2.97381	0.00994608	0.517656	-2.63159
DUOXA2	1.93224	12.48	3.57281	0.00300443	0.491052	-1.81856
DUOXA1	1.93224	12.48	3.57281	0.00300443	0.491052	-1.81856
ACTG2	1.94351	9.64106	4.66229	0.000354577	0.491052	-0.442407
DUOX1	1.96813	11.9799	2.31222	0.0362822	0.55613	-3.52563
GRIN1	1.9766	10.7986	2.22667	0.0426725	0.55613	-3.63745
LRRC26	1.9766	10.7986	2.22667	0.0426725	0.55613	-3.63745
TRPM6	2.10876	12.8943	2.33643	0.0346442	0.55613	-3.49374
MAP2K6	2.19221	9.82315	2.8774	0.0120466	0.517656	-2.76349
SLC7A4	2.19367	7.44853	2.43712	0.0285544	0.550227	-3.36013
AC108941.2	2.19955	8.51687	2.33982	0.0344209	0.55613	-3.48927
SULT1E1	2.19955	8.51687	2.33982	0.0344209	0.55613	-3.48927
XDH	2.25895	9.36353	2.42783	0.0290705	0.550227	-3.37252
ATP12A	2.37135	8.20081	2.69029	0.017434	0.526491	-3.01875
CCL21	2.45999	10.0362	3.90951	0.00153731	0.491052	-1.37503
MAP2K3	2.50246	11.6918	2.76972	0.0149086	0.522877	-2.91059
CYP26A1	2.57918	9.9164	2.38304	0.0316861	0.550475	-3.43208
MEGF10	2.70726	8.03631	3.33054	0.00487722	0.491052	-2.14487
CAPN6	2.87194	9.02828	2.54601	0.0231213	0.530484	-3.2141
PKHD1L1	3.05054	7.85224	2.61407	0.0202453	0.530484	-3.12218
OPRPN	3.38602	8.77548	2.50764	0.0249117	0.530735	-3.26572

## Sheet: DE miRNA 71332
	logFC	AveExpr	t	P.Value	adj.P.Val	B
hsa-miR-1207-5p	-1.38087	8.81444	-5.49683	4.4604e-05	0.00136042	2.05833
hsa-miR-6088	-1.13801	7.78114	-5.11347	9.647e-05	0.00255518	1.28674
hsa-miR-4687-3p	-1.0028	9.06409	-2.53184	0.0219065	0.149484	-4.02575
hsa-miR-6090	-0.94241	10.1128	-3.22332	0.0051755	0.0549573	-2.64925
hsa-miR-4306	-0.936869	7.3305	-6.66914	4.74563e-06	0.000268279	4.30138
hsa-miR-4701-5p	-0.928212	5.68287	-5.43666	5.02847e-05	0.00148857	1.93836
hsa-miR-744-5p	0.91509	5.3217	8.22389	3.2352e-07	4.39243e-05	6.97842
hsa-miR-24-3p	0.915114	11.1887	4.42455	0.000401843	0.0077039	-0.135859
hsa-miR-218-5p	0.915239	5.8961	4.08812	0.000818511	0.0143275	-0.841415
hsa-miR-664b-3p	0.916303	6.59811	5.51067	4.33936e-05	0.00135703	2.08586
hsa-miR-505-3p	0.941192	5.36355	4.92538	0.00014174	0.00331772	0.902386
hsa-miR-34b-3p	0.957653	5.40412	3.9915	0.00100527	0.0165171	-1.04458
hsa-miR-127-3p	0.959785	6.07723	3.66496	0.00201795	0.0269016	-1.73068
hsa-miR-222-3p	0.967145	6.96456	3.91041	0.00119489	0.0186459	-1.21514
hsa-miR-371b-5p	0.971774	5.36652	6.14605	1.26056e-05	0.000539894	3.32361
hsa-miR-145-3p	0.985264	5.41977	6.45351	7.06682e-06	0.000349529	3.90297
hsa-miR-4713-3p	0.990179	6.58616	5.48652	4.55285e-05	0.00136789	2.0378
hsa-miR-362-3p	0.995157	7.09676	5.08731	0.000101749	0.00266002	1.23349
hsa-miR-532-3p	0.999204	6.66934	4.82253	0.000175212	0.00375215	0.690808
hsa-miR-6125	0.999753	8.91707	5.34921	5.99048e-05	0.00172274	1.7632
hsa-miR-199a-3p	1.01328	11.8118	3.9812	0.00102758	0.0166815	-1.06626
hsa-let-7e-5p	1.01352	9.27408	3.11167	0.00655756	0.0634912	-2.87803
hsa-miR-107	1.02411	8.72518	3.33224	0.00410527	0.0477682	-2.42444
hsa-miR-181b-5p	1.03461	6.83178	3.75719	0.00165706	0.0231643	-1.53715
hsa-miR-203a	1.04299	5.64365	4.63758	0.000257225	0.0052836	0.308046
hsa-miR-135b-5p	1.04871	5.25649	4.97912	0.000126934	0.00311607	1.01256
hsa-miR-10b-5p	1.08689	10.3498	2.7829	0.013072	0.103593	-3.53873
hsa-miR-130a-3p	1.09583	10.6477	5.27748	6.92021e-05	0.00196203	1.61888
hsa-miR-660-5p	1.12993	6.52878	5.07607	0.000104107	0.00268676	1.2106
hsa-miR-29c-3p	1.1334	9.8635	3.12972	0.00631174	0.0616773	-2.84116
hsa-miR-16-2-3p	1.13666	5.48476	5.77098	2.59828e-05	0.000950972	2.59932
hsa-let-7b-5p	1.14231	12.8571	3.89909	0.00122407	0.0187633	-1.23894
hsa-miR-98-5p	1.14361	5.91037	6.31508	9.15566e-06	0.000418872	3.64376
hsa-miR-455-3p	1.14526	6.86399	5.04152	0.000111714	0.00284658	1.14014
hsa-miR-4428	1.14681	6.48732	7.13626	2.04708e-06	0.000158492	5.14172
hsa-miR-494	1.15441	10.8681	5.00064	0.000121457	0.00301842	1.05661
hsa-miR-26b-5p	1.16566	9.68128	4.02841	0.000929314	0.0155832	-0.966961
hsa-miR-96-5p	1.16869	6.51424	6.66317	4.79784e-06	0.000268279	4.29044
hsa-miR-6131	1.18382	5.77362	8.21674	3.27305e-07	4.39243e-05	6.96688
hsa-miR-18a-5p	1.18676	6.0672	5.84318	2.25728e-05	0.000841463	2.7402
hsa-miR-4286	1.20097	12.0118	6.74985	4.09524e-06	0.000256357	4.4488
hsa-miR-301a-3p	1.20525	5.67065	7.44596	1.19153e-06	9.99395e-05	5.68169
hsa-miR-141-3p	1.21502	11.8294	6.73565	4.20258e-06	0.000256357	4.42293
hsa-miR-454-3p	1.22573	5.87091	6.70658	4.43146e-06	0.000262368	4.36989
hsa-miR-146a-5p	1.23338	5.38744	5.64146	3.34992e-05	0.00116265	2.34492
hsa-miR-92a-3p	1.26674	7.68812	4.4929	0.000348103	0.00680322	0.00688541
hsa-miR-590-5p	1.28308	6.0297	8.08315	4.07223e-07	5.12337e-05	6.75004
hsa-miR-5100	1.28584	14.0642	7.92431	5.29576e-07	5.92242e-05	6.48902
hsa-miR-21-5p	1.28792	14.4422	4.26731	0.000559841	0.0100621	-0.465117
hsa-miR-125b-5p	1.29481	12.3761	5.59282	3.68739e-05	0.00123712	2.24883
hsa-miR-425-5p	1.29794	7.51144	7.49951	1.0865e-06	9.50923e-05	5.77367
hsa-miR-151a-3p	1.3253	6.85761	5.61688	3.51632e-05	0.00119972	2.29639
hsa-let-7i-5p	1.34172	10.6355	3.26065	0.0047808	0.0528777	-2.57236
hsa-miR-455-5p	1.35601	5.90966	6.40755	7.69901e-06	0.000369003	3.81722
hsa-miR-340-5p	1.35947	6.03206	8.33945	2.6832e-07	4.39243e-05	7.16392
hsa-miR-150-5p	1.38348	6.80232	4.95458	0.000133488	0.00323748	0.962281
hsa-miR-136-5p	1.39071	5.83948	6.44955	7.11908e-06	0.000349529	3.8956
hsa-miR-449a	1.39723	8.51033	3.78232	0.00157047	0.0224209	-1.48437
hsa-miR-29b-3p	1.40025	10.5285	3.11146	0.00656044	0.0634912	-2.87845
hsa-miR-23b-3p	1.40162	12.0728	5.74344	2.74201e-05	0.000985655	2.54541
hsa-miR-6717-5p	1.40695	5.94507	7.72911	7.34628e-07	7.04194e-05	6.16346
hsa-miR-93-5p	1.42785	8.92506	5.85829	2.19197e-05	0.000832536	2.7696
hsa-miR-16-5p	1.48609	12.0329	3.43785	0.00327763	0.0404777	-2.2052
hsa-miR-142-5p	1.48761	6.19627	4.60569	0.000274917	0.00558997	0.241796
hsa-miR-186-5p	1.49741	5.70896	8.59706	1.77878e-07	3.76939e-05	7.57096
hsa-miR-181a-5p	1.52225	8.71809	3.82181	0.0014435	0.0210563	-1.4014
hsa-miR-375	1.52883	6.01921	6.31719	9.11947e-06	0.000418872	3.64773
hsa-miR-200b-3p	1.53194	10.1711	4.76669	0.000196677	0.00416749	0.575538
hsa-miR-223-3p	1.54166	6.1852	7.80794	6.43285e-07	6.63648e-05	6.29558
hsa-let-7d-5p	1.55928	8.82878	5.14333	9.07877e-05	0.00246967	1.34742
hsa-miR-146b-5p	1.57932	5.68553	5.50576	4.38188e-05	0.00135703	2.07611
hsa-miR-34c-5p	1.59475	7.19192	4.28079	0.000544112	0.00986755	-0.436847
hsa-miR-26a-5p	1.60695	11.1324	4.59113	0.000283409	0.00568972	0.211503
hsa-miR-221-3p	1.62061	7.625	4.82589	0.000174	0.00375215	0.697732
hsa-miR-29a-3p	1.648	10.3076	3.84315	0.00137924	0.020566	-1.35656
hsa-miR-376c-3p	1.72049	7.24271	6.64522	4.95841e-06	0.000269764	4.25751
hsa-miR-126-3p	1.72945	8.43607	5.13223	9.28573e-05	0.00249229	1.32489
hsa-miR-148b-3p	1.74654	6.95175	11.3414	3.52791e-09	1.77542e-06	11.3992
hsa-miR-429	1.88814	7.25078	6.24505	1.04477e-05	0.000467361	3.5116
hsa-miR-365a-3p	1.89254	7.19964	6.55709	5.83188e-06	0.000308936	4.09518
hsa-miR-424-5p	1.92236	10.8781	5.34919	5.99067e-05	0.00172274	1.76317
hsa-miR-200a-3p	1.98289	7.42627	4.82743	0.000173447	0.00375215	0.700909
hsa-miR-100-5p	2.01006	7.44689	6.50138	6.46539e-06	0.000333714	3.99199
hsa-miR-3653	2.04071	6.81382	5.14566	9.03586e-05	0.00246967	1.35215
hsa-miR-20b-5p	2.04411	8.43743	6.09021	1.40221e-05	0.00057605	3.21698
hsa-miR-23a-3p	2.04995	9.56721	5.70035	2.98364e-05	0.0010537	2.46085
hsa-miR-125a-5p	2.08808	7.99024	4.91685	0.000144248	0.00333761	0.884877
hsa-miR-30e-5p	2.14416	6.46569	9.19352	7.07988e-08	2.03597e-05	8.47993
hsa-miR-140-5p	2.18024	6.49004	8.03588	4.40185e-07	5.2123e-05	6.67274
hsa-miR-25-3p	2.22038	7.28682	10.6243	9.12222e-09	3.67261e-06	10.4821
hsa-miR-101-3p	2.22223	7.60228	8.5646	1.87253e-07	3.76939e-05	7.52015
hsa-miR-451a	2.22957	12.7378	3.42806	0.00334679	0.0410798	-2.22556
hsa-miR-196b-5p	2.25597	9.09405	5.9314	1.90255e-05	0.000736505	2.91141
hsa-miR-99a-5p	2.26448	8.61287	7.21931	1.76831e-06	0.000142384	5.28787
hsa-miR-497-5p	2.36526	7.94636	8.82779	1.23935e-07	3.11851e-05	7.92804
hsa-miR-144-3p	2.38747	7.79746	4.49491	0.000346637	0.00680322	0.0110827
hsa-miR-450a-5p	2.40794	6.44606	12.8256	5.69552e-10	3.82169e-07	13.135
hsa-miR-199a-5p	2.61594	10.937	7.79325	6.59362e-07	6.63648e-05	6.27103
hsa-miR-374b-5p	2.83902	6.76405	8.34554	2.65703e-07	4.39243e-05	7.17364
hsa-let-7c	2.90064	9.42552	6.18937	1.16095e-05	0.000508042	3.40603
hsa-miR-19b-3p	3.06922	8.88724	7.60069	9.13601e-07	8.35945e-05	5.94637
hsa-miR-142-3p	3.08951	8.00087	6.90787	3.07655e-06	0.000216552	4.73474
hsa-miR-145-5p	3.23121	8.75756	5.57297	3.83508e-05	0.00124595	2.20952
hsa-miR-30c-5p	3.26892	7.7297	10.1731	1.70103e-08	5.70694e-06	9.87652
hsa-miR-30b-5p	3.33387	11.3103	8.23676	3.16823e-07	4.39243e-05	6.99917
hsa-miR-374a-5p	3.42586	6.97465	19.2747	1.067e-12	1.28124e-09	18.7647
hsa-let-7g-5p	4.06248	10.0642	6.04485	1.52936e-05	0.000615722	3.13005
hsa-miR-199b-5p	4.16637	7.40195	19.0598	1.27297e-12	1.28124e-09	18.6159
hsa-let-7f-5p	4.3674	10.0163	6.89622	3.14172e-06	0.000216552	4.71379
